# Supplementary material for: Electronic and geometric structures of Au30clusters: a network of 2e-superatom Au cores protected by tridentate protecting motifs with u3-S
Source: Royal Society of Chemistry journal article supplement (doi:10.1039/c5nr05020k), 2015-10-26
Supplement: c5nr05020k1.pdf [file c5nr05020k1.pdf]

## Electronic Supplementary Information (ESI)

### **Electronic and geometric structures of Au<sub>30</sub> clusters: A network of 2e-superatom Au cores protected by tridentate protecting motifs with $u_3$ -S**

By

Zhimei Tian,<sup>a,b</sup> and Longjiu Cheng<sup>a\*</sup>

<sup>a</sup>Department of Chemistry, Anhui University, Hefei, Anhui, 230601, China.

<sup>b</sup>School of Chemistry and Materials Engineering, Fuyang Teachers College, Fuyang, Anhui, 236037, China.

\*Corresponding author. E-mail: clj@ustc.edu

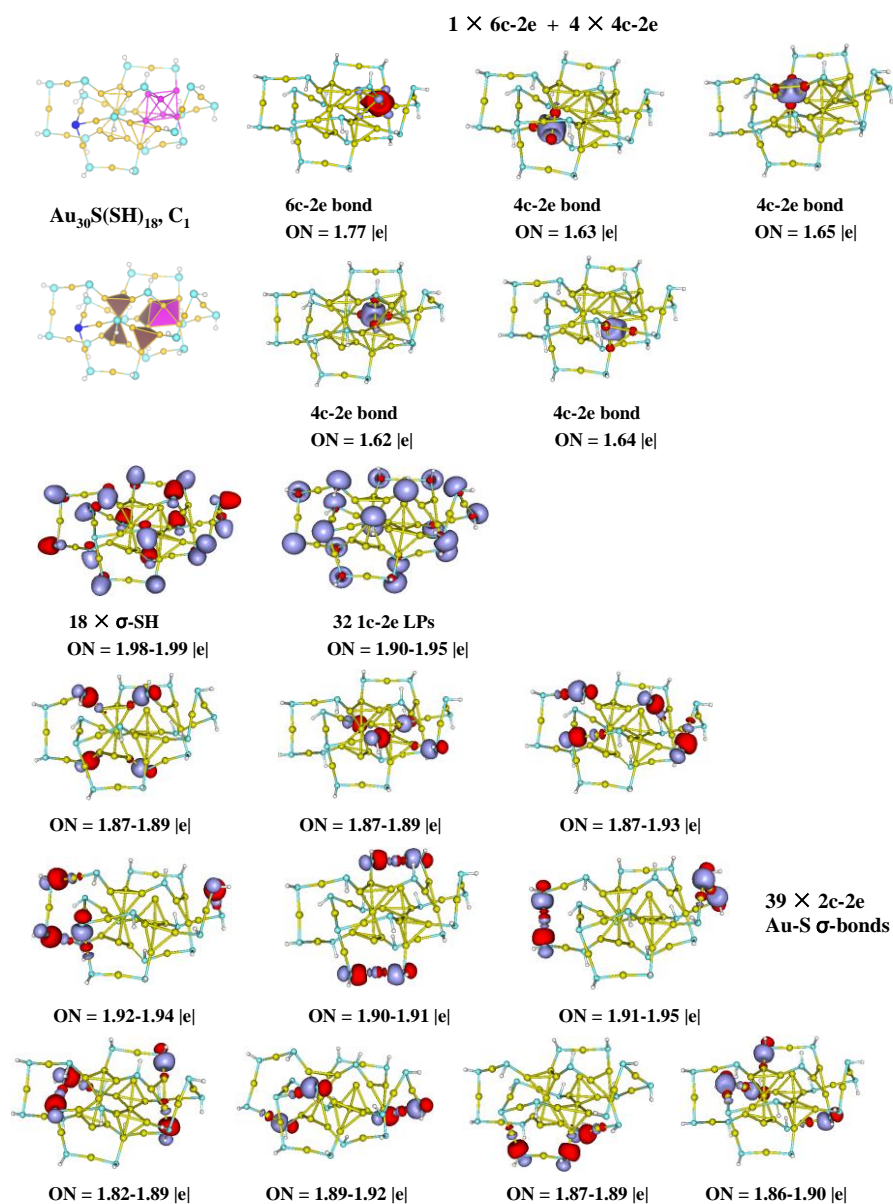

**Fig. S1** Geometry (Au yellow, S baby blue and blue, H white) and AdNDP localized natural bonding orbitals (red-grey) of Au<sub>30</sub>S(SH)<sub>18</sub> cluster. The 5d lone pairs of Au atoms with ONs = 1.83-2.00 |e| are not included.

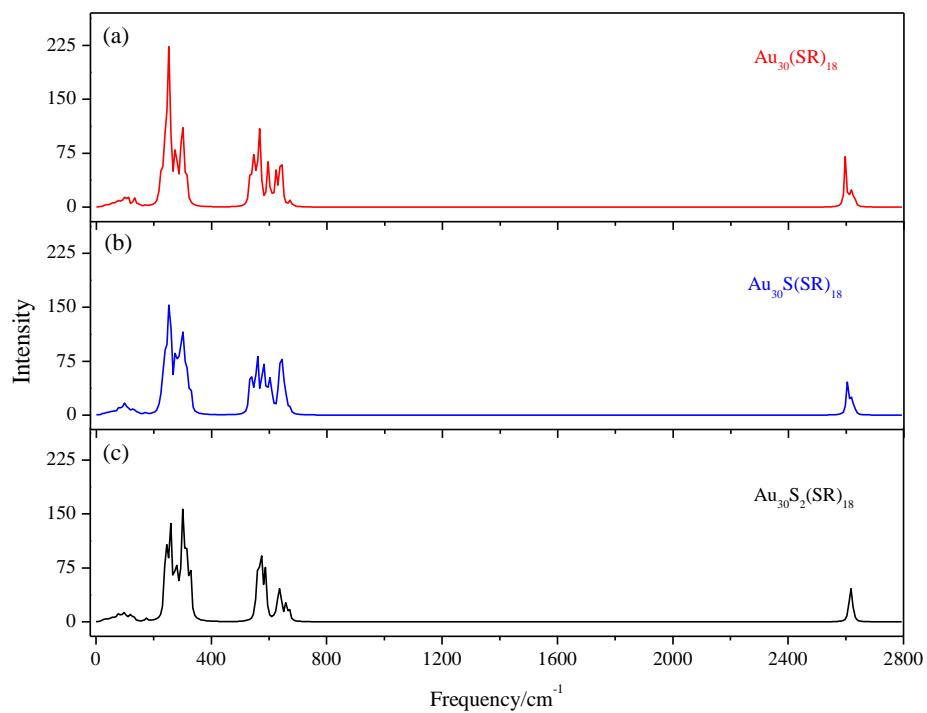

**Fig. S2** IR spectra of (a)  $\text{Au}_{30}(\text{SR})_{18}$ , (b)  $\text{Au}_{30}\text{S}(\text{SR})_{18}$  and (c)  $\text{Au}_{30}\text{S}_2(\text{SR})_{18}$  clusters, R = CH<sub>3</sub>.

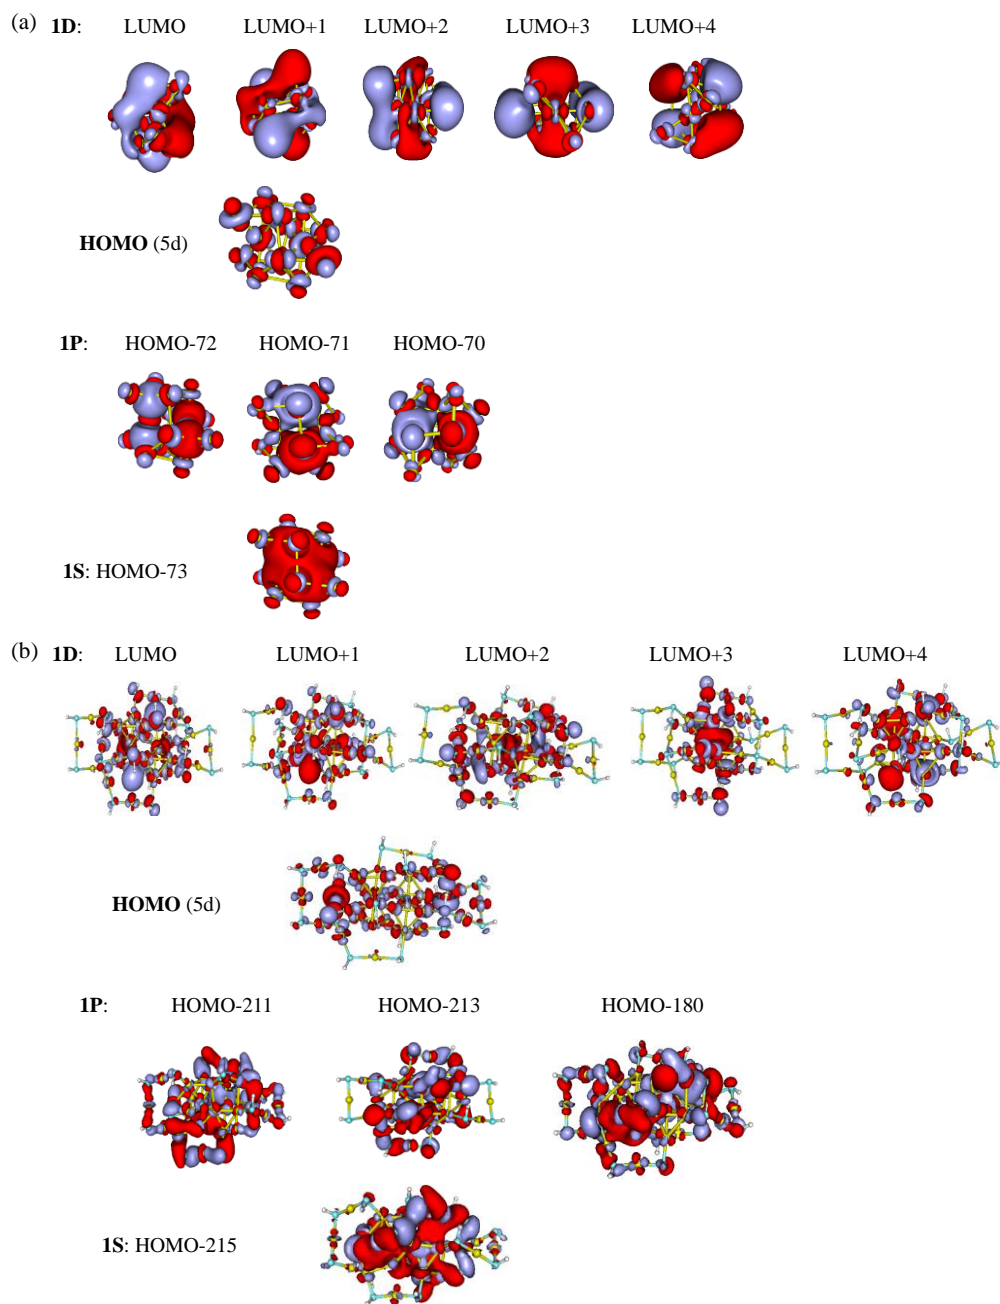

**Fig. S3** (a) The superatomic orbitals of  $\text{Au}_{14}^{6+}$  cluster, and (b) the superatomic orbitals of  $\text{Au}_{30}\text{S}_2(\text{SH})_{18}$  cluster.

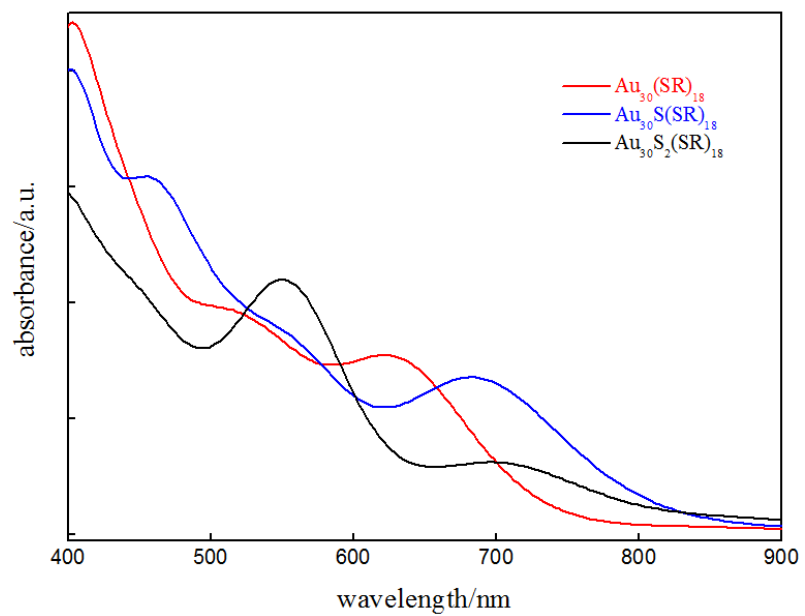

**Fig. S4** Calculated optical absorption spectra of  $\text{Au}_{30}(\text{SR})_{18}$ ,  $\text{Au}_{30}\text{S}(\text{SR})_{18}$  and  $\text{Au}_{30}\text{S}_2(\text{SR})_{18}$  clusters,  $\text{R} = \text{CH}_3$ .

The xyz coordinates (in Å) of Au<sub>30</sub>S(SCH<sub>3</sub>)<sub>18</sub>, Au<sub>30</sub>(SCH<sub>3</sub>)<sub>18</sub> and Au<sub>30</sub>S<sub>2</sub>(SCH<sub>3</sub>)<sub>18</sub> clusters optimized at the TPSS/Lanl2dz basis set for Au and 6-31G\* basis set for S and H level of theory.

Au<sub>30</sub>S(SCH<sub>3</sub>)<sub>18</sub> cluster:

|    |           |           |           |
|----|-----------|-----------|-----------|
| Au | 2.029198  | 2.212240  | 0.563530  |
| Au | -1.545704 | 0.805764  | -0.202273 |
| Au | 1.277294  | -0.351783 | -0.048013 |
| Au | 0.641314  | 1.954852  | -1.829840 |
| Au | -0.732482 | 3.347585  | 0.446880  |
| Au | -0.340442 | -1.729319 | 1.841068  |
| Au | -2.758463 | 3.004849  | -2.006904 |
| Au | 3.207937  | 0.849029  | -1.629897 |
| Au | 4.847283  | 2.499007  | 0.470042  |
| Au | -0.166161 | 1.200632  | 2.194859  |
| Au | -2.034443 | -1.871421 | -0.520712 |
| Au | -2.796308 | 2.094691  | 1.910844  |
| Au | 4.728821  | -1.074358 | 0.117143  |
| Au | -0.396006 | -0.672571 | -2.436289 |
| Au | 0.601729  | -2.931952 | -0.557130 |
| Au | 2.545145  | -1.946868 | -2.664242 |
| Au | 2.291812  | 4.992650  | -0.110071 |
| Au | 3.055330  | 0.619160  | 2.783437  |
| Au | -3.383946 | -0.806627 | 1.770363  |
| Au | 2.394056  | -2.205948 | 1.606548  |
| Au | -4.666173 | 0.850105  | 0.010938  |
| Au | 6.468188  | 0.996299  | -1.751707 |
| Au | -3.108367 | -0.028231 | -2.352735 |
| Au | -4.833469 | -1.820313 | -0.434035 |
| Au | -2.593006 | -4.538228 | -1.196303 |
| Au | -5.462897 | 0.691272  | 3.267879  |
| Au | 7.888723  | -1.290858 | 0.296574  |
| Au | -6.410671 | -0.158640 | -2.495332 |
| Au | -7.277545 | -0.763181 | 0.909164  |
| Au | 5.645885  | -3.529457 | 1.938817  |
| S  | 4.572245  | 4.590666  | -0.680747 |
| S  | 5.206680  | 0.566891  | 1.795022  |
| S  | -2.061346 | -1.868040 | 3.556846  |
| S  | 1.040910  | -1.193666 | -4.363110 |
| S  | 4.831824  | 0.945118  | -3.475562 |
| S  | 1.122444  | 0.712429  | 4.196940  |
| S  | 0.042709  | 5.648892  | 0.298909  |
| S  | -0.271551 | -5.078930 | -1.355353 |
| S  | 4.299184  | -2.911487 | -1.381694 |

|   |           |           |           |
|---|-----------|-----------|-----------|
| S | -4.979280 | 3.043517  | -1.101616 |
| S | -0.757061 | 3.350567  | -3.275417 |
| S | -4.724466 | -0.006500 | -4.171266 |
| S | -4.422298 | 2.806842  | 3.595424  |
| S | 8.271462  | 1.008062  | -0.187845 |
| S | -4.949457 | -4.147739 | -1.241112 |
| S | -6.560682 | -1.424733 | 3.092081  |
| S | 7.701883  | -3.613862 | 0.750203  |
| S | -8.362295 | -0.199462 | -1.127285 |
| S | 3.614545  | -3.648119 | 3.149133  |
| C | 1.313066  | 2.365824  | 5.020187  |
| C | 4.742959  | 2.683349  | -4.112543 |
| C | -3.487418 | 2.570191  | 5.180933  |
| C | -4.949143 | 4.417382  | 0.141496  |
| C | 9.786291  | 0.972201  | -1.262062 |
| C | -2.639743 | -3.628437 | 3.493939  |
| C | 0.047431  | 6.194962  | 2.071746  |
| C | 0.302522  | -2.764431 | -5.020825 |
| C | 5.502145  | 5.790674  | 0.384880  |
| C | -4.628309 | -1.730954 | -4.849943 |
| C | 5.705964  | -2.888917 | -2.592624 |
| C | -1.038974 | 2.352292  | -4.810558 |
| C | -5.577543 | -5.040410 | 0.257848  |
| C | 0.027968  | -6.178617 | 0.108411  |
| C | -8.096020 | -1.265598 | 4.127880  |
| C | 8.968134  | -3.911659 | 2.073083  |
| C | -8.740952 | 1.607143  | -0.943415 |
| C | 3.921875  | -2.575245 | 4.629672  |
| H | -8.754649 | -2.106058 | 3.883422  |
| H | -8.603268 | -0.318711 | 3.928972  |
| H | -7.796400 | -1.320074 | 5.180204  |
| H | -4.207456 | 2.584764  | 6.006077  |
| H | -2.788583 | 3.407805  | 5.281167  |
| H | -2.942025 | 1.623086  | 5.170979  |
| H | -9.501875 | 1.712628  | -0.163180 |
| H | -9.134437 | 1.960656  | -1.902242 |
| H | -7.838061 | 2.164520  | -0.680376 |
| H | -5.523266 | -1.906607 | -5.456279 |
| H | -4.567414 | -2.466170 | -4.044312 |
| H | -3.733613 | -1.787260 | -5.479076 |
| H | -5.446589 | -6.116267 | 0.102015  |
| H | -6.641972 | -4.801424 | 0.351703  |
| H | -5.046346 | -4.713941 | 1.155228  |
| H | -5.817794 | 4.301152  | 0.798197  |

|   |           |           |           |
|---|-----------|-----------|-----------|
| H | -5.015995 | 5.362751  | -0.408185 |
| H | -4.029841 | 4.386750  | 0.733226  |
| H | -3.632716 | -3.672235 | 3.954751  |
| H | -1.933199 | -4.240138 | 4.065984  |
| H | -2.691709 | -3.980330 | 2.459811  |
| H | -0.518553 | -7.114949 | -0.045530 |
| H | -0.295069 | -5.690913 | 1.031364  |
| H | 1.104375  | -6.373966 | 0.149715  |
| H | -1.805496 | 2.860150  | -5.405595 |
| H | -1.362795 | 1.338965  | -4.556438 |
| H | -0.092352 | 2.317256  | -5.360128 |
| H | 0.599808  | 7.138294  | 2.137761  |
| H | 0.508363  | 5.438631  | 2.711342  |
| H | -0.994953 | 6.350922  | 2.368929  |
| H | 5.284172  | 6.802636  | 0.027577  |
| H | 6.568903  | 5.573013  | 0.267772  |
| H | 5.212253  | 5.685287  | 1.433192  |
| H | 10.646128 | 0.747322  | -0.621816 |
| H | 9.904431  | 1.966454  | -1.706140 |
| H | 9.691741  | 0.218202  | -2.046925 |
| H | 8.820677  | -4.929731 | 2.448590  |
| H | 8.860132  | -3.189412 | 2.885515  |
| H | 9.958427  | -3.821822 | 1.614399  |
| H | 5.476597  | -3.616583 | -3.378697 |
| H | 6.608811  | -3.190526 | -2.051150 |
| H | 5.837763  | -1.892287 | -3.021193 |
| H | 5.608485  | 2.847507  | -4.763798 |
| H | 4.744629  | 3.403353  | -3.291073 |
| H | 3.817373  | 2.772127  | -4.690985 |
| H | 2.112715  | 2.284379  | 5.764333  |
| H | 0.365852  | 2.604932  | 5.515556  |
| H | 1.560514  | 3.138043  | 4.287766  |
| H | 4.578452  | -3.126465 | 5.311762  |
| H | 2.955425  | -2.385311 | 5.107999  |
| H | 4.384950  | -1.629225 | 4.335968  |
| H | 1.054682  | -3.264276 | -5.640449 |
| H | -0.563729 | -2.493509 | -5.634421 |
| H | -0.008325 | -3.420938 | -4.204408 |



Au<sub>30</sub>(SCH<sub>3</sub>)<sub>18</sub> cluster:

|    |           |           |           |
|----|-----------|-----------|-----------|
| Au | -1.156746 | 2.688136  | -0.181298 |
| Au | 1.035689  | 1.046393  | -0.213833 |
| Au | -1.116012 | 0.928338  | -2.348015 |
| Au | -3.176945 | 0.664333  | -0.146462 |
| Au | 1.272352  | -0.723085 | 1.980596  |
| Au | 0.776474  | 2.985707  | -2.176035 |
| Au | -0.005137 | 5.217479  | 0.001452  |
| Au | 2.408129  | 4.028033  | 0.045653  |
| Au | 3.176945  | -0.664333 | -0.146462 |
| Au | 3.473783  | 1.608950  | -2.188313 |
| Au | -3.453606 | 4.284602  | -0.449081 |
| Au | 0.612298  | 3.328466  | 1.989529  |
| Au | 2.950534  | 1.489513  | 1.685985  |
| Au | 1.599832  | 6.183143  | -2.415170 |
| Au | 1.953589  | 7.201736  | 1.055706  |
| Au | 3.129576  | 4.533005  | 3.158380  |
| Au | 1.156746  | -2.688136 | -0.181298 |
| Au | -1.035689 | -1.046393 | -0.213833 |
| Au | 1.116012  | -0.928338 | -2.348015 |
| Au | -1.272352 | 0.723085  | 1.980596  |
| Au | -0.776474 | -2.985707 | -2.176035 |
| Au | 0.005137  | -5.217479 | 0.001452  |
| Au | -2.408129 | -4.028033 | 0.045653  |
| Au | -3.473783 | -1.608950 | -2.188313 |
| Au | 3.453606  | -4.284602 | -0.449081 |
| Au | -0.612298 | -3.328466 | 1.989529  |
| Au | -2.950534 | -1.489513 | 1.685985  |
| Au | -1.599832 | -6.183143 | -2.415170 |
| Au | -1.953589 | -7.201736 | 1.055706  |
| Au | -3.129576 | -4.533005 | 3.158380  |
| S  | -2.172635 | 6.297239  | -0.526032 |
| S  | 2.615069  | 0.209040  | -3.928617 |
| S  | 1.427132  | 4.443523  | -4.023014 |
| S  | -0.578872 | 2.183868  | 3.811522  |
| S  | -4.885303 | 2.375484  | -0.537223 |
| S  | 4.585170  | 3.199899  | -0.784924 |
| S  | 1.814789  | 8.165501  | -1.116110 |
| S  | 2.183623  | 6.709500  | 3.374045  |
| S  | 4.465676  | 2.559468  | 3.245568  |
| S  | 2.172635  | -6.297239 | -0.526032 |
| S  | -2.615069 | -0.209040 | -3.928617 |
| S  | -1.427132 | -4.443523 | -4.023014 |
| S  | 0.578872  | -2.183868 | 3.811522  |

|   |           |           |           |
|---|-----------|-----------|-----------|
| S | 4.885303  | -2.375484 | -0.537223 |
| S | -4.585170 | -3.199899 | -0.784924 |
| S | -1.814789 | -8.165501 | -1.116110 |
| S | -2.183623 | -6.709500 | 3.374045  |
| S | -4.465676 | -2.559468 | 3.245568  |
| C | -2.615069 | 7.150534  | 1.058436  |
| C | 3.972203  | -1.015403 | -4.243566 |
| C | -0.174389 | 4.814960  | -4.884263 |
| C | -2.076440 | 3.245876  | 4.076481  |
| C | -5.779068 | 2.412171  | 1.087038  |
| C | 5.182237  | 4.463557  | -2.007009 |
| C | 3.548869  | 8.729219  | -1.459436 |
| C | 0.442306  | 6.451523  | 3.943023  |
| C | 3.980456  | 1.809648  | 4.872390  |
| C | 2.615069  | -7.150534 | 1.058436  |
| C | -3.972203 | 1.015403  | -4.243566 |
| C | 0.174389  | -4.814960 | -4.884263 |
| C | 2.076440  | -3.245876 | 4.076481  |
| C | 5.779068  | -2.412171 | 1.087038  |
| C | -5.182237 | -4.463557 | -2.007009 |
| C | -3.548869 | -8.729219 | -1.459436 |
| C | -0.442306 | -6.451523 | 3.943023  |
| C | -3.980456 | -1.809648 | 4.872390  |
| H | 0.480024  | 6.037664  | 4.956192  |
| H | -0.077335 | 5.762052  | 3.269186  |
| H | -0.052917 | 7.428538  | 3.956041  |
| H | 4.399059  | 2.431394  | 5.671052  |
| H | 4.413956  | 0.804676  | 4.916387  |
| H | 2.893101  | 1.752412  | 4.966431  |
| H | 3.758149  | 9.579126  | -0.801433 |
| H | 3.594062  | 9.045480  | -2.507025 |
| H | 4.266182  | 7.925792  | -1.276546 |
| H | -0.020514 | 5.681776  | -5.535724 |
| H | -0.966807 | 5.019125  | -4.160538 |
| H | -0.430266 | 3.934939  | -5.483706 |
| H | 5.988508  | 4.015462  | -2.597617 |
| H | 5.570919  | 5.312599  | -1.433448 |
| H | 4.369975  | 4.791693  | -2.661533 |
| H | 6.444567  | -3.281811 | 1.095097  |
| H | 5.069542  | -2.463903 | 1.916466  |
| H | 6.364822  | -1.489786 | 1.155213  |
| H | 3.653141  | -7.492670 | 0.991698  |
| H | 1.944682  | -8.010533 | 1.160242  |
| H | 2.491078  | -6.478512 | 1.911783  |

|   |           |           |           |
|---|-----------|-----------|-----------|
| H | -3.758149 | -9.579126 | -0.801433 |
| H | -3.594062 | -9.045480 | -2.507025 |
| H | -4.266182 | -7.925792 | -1.276546 |
| H | -0.480024 | -6.037664 | 4.956192  |
| H | 0.077335  | -5.762052 | 3.269186  |
| H | 0.052917  | -7.428538 | 3.956041  |
| H | -4.399059 | -2.431394 | 5.671052  |
| H | -4.413956 | -0.804676 | 4.916387  |
| H | -2.893101 | -1.752412 | 4.966431  |
| H | -3.653141 | 7.492670  | 0.991698  |
| H | -1.944682 | 8.010533  | 1.160242  |
| H | -2.491078 | 6.478512  | 1.911783  |
| H | -6.444567 | 3.281811  | 1.095097  |
| H | -5.069542 | 2.463903  | 1.916466  |
| H | -6.364822 | 1.489786  | 1.155213  |
| H | -2.842763 | 2.639919  | 4.572297  |
| H | -2.454814 | 3.624879  | 3.122705  |
| H | -1.791773 | 4.081108  | 4.726378  |
| H | 1.791773  | -4.081108 | 4.726378  |
| H | 2.842763  | -2.639919 | 4.572297  |
| H | 2.454814  | -3.624879 | 3.122705  |
| H | 0.020514  | -5.681776 | -5.535724 |
| H | 0.966807  | -5.019125 | -4.160538 |
| H | 0.430266  | -3.934939 | -5.483706 |
| H | -5.988508 | -4.015462 | -2.597617 |
| H | -5.570919 | -5.312599 | -1.433448 |
| H | -4.369975 | -4.791693 | -2.661533 |
| H | 3.562967  | -1.805082 | -4.883207 |
| H | 4.343859  | -1.443616 | -3.309587 |
| H | 4.782182  | -0.496124 | -4.767356 |
| H | -4.782182 | 0.496124  | -4.767356 |
| H | -3.562967 | 1.805082  | -4.883207 |
| H | -4.343859 | 1.443616  | -3.309587 |

Au<sub>30</sub>S<sub>2</sub>(SCH<sub>3</sub>)<sub>18</sub> cluster:

|    |           |           |           |
|----|-----------|-----------|-----------|
| Au | -0.962994 | 2.832165  | 0.189863  |
| Au | 1.115841  | 1.070108  | 0.040170  |
| Au | -0.913489 | 1.147929  | -2.017210 |
| Au | -3.103632 | 0.781859  | 0.035152  |
| Au | 1.282952  | -0.726730 | 2.177183  |
| Au | 1.044654  | 3.128941  | -1.818750 |
| Au | 0.029155  | 5.483514  | -0.033118 |
| Au | 3.225719  | 3.782119  | 0.094666  |
| Au | 3.103632  | -0.781859 | 0.035152  |
| Au | 3.261596  | 1.086375  | -2.357540 |
| Au | -3.286825 | 4.196622  | -0.772908 |
| Au | 0.655669  | 3.365206  | 2.593155  |
| Au | 3.053197  | 1.422510  | 1.929382  |
| Au | 2.341337  | 6.120020  | -2.078086 |
| Au | 4.840306  | 6.508859  | 0.133957  |
| Au | 5.644417  | 3.735056  | 2.191154  |
| Au | 0.962994  | -2.832165 | 0.189863  |
| Au | -1.115841 | -1.070108 | 0.040170  |
| Au | 0.913489  | -1.147929 | -2.017210 |
| Au | -1.282952 | 0.726730  | 2.177183  |
| Au | -1.044654 | -3.128941 | -1.818750 |
| Au | -0.029155 | -5.483514 | -0.033118 |
| Au | -3.225719 | -3.782119 | 0.094666  |
| Au | -3.261596 | -1.086375 | -2.357540 |
| Au | 3.286825  | -4.196622 | -0.772908 |
| Au | -0.655669 | -3.365206 | 2.593155  |
| Au | -3.053197 | -1.422510 | 1.929382  |
| Au | -2.341337 | -6.120020 | -2.078086 |
| Au | -4.840306 | -6.508859 | 0.133957  |
| Au | -5.644417 | -3.735056 | 2.191154  |
| S  | -1.809481 | -5.113574 | 1.489323  |
| S  | 1.809481  | 5.113574  | 1.489323  |
| S  | -1.892889 | 6.039814  | -1.366970 |
| S  | 2.092440  | -0.244139 | -3.962184 |
| S  | 1.816082  | 4.482129  | -3.718560 |
| S  | -0.499980 | 1.933300  | 4.128872  |
| S  | -4.840306 | 2.436762  | -0.408739 |
| S  | 4.795509  | 2.438876  | -1.139817 |
| S  | 3.013470  | 7.856899  | -0.586303 |
| S  | 6.773756  | 5.311175  | 0.818363  |
| S  | 4.684998  | 2.095987  | 3.605505  |
| S  | 1.892889  | -6.039814 | -1.366970 |
| S  | -2.092440 | 0.244139  | -3.962184 |

|   |           |           |           |
|---|-----------|-----------|-----------|
| S | -1.816082 | -4.482129 | -3.718560 |
| S | 0.499980  | -1.933300 | 4.128872  |
| S | 4.840306  | -2.436762 | -0.408739 |
| S | -4.795509 | -2.438876 | -1.139817 |
| S | -3.013470 | -7.856899 | -0.586303 |
| S | -6.773756 | -5.311175 | 0.818363  |
| S | -4.684998 | -2.095987 | 3.605505  |
| C | -2.643705 | 7.465056  | -0.447205 |
| C | 3.327059  | -1.562719 | -4.391403 |
| C | 0.272736  | 5.087231  | -4.545540 |
| C | -1.953946 | 2.970846  | 4.635261  |
| C | -5.530725 | 2.757566  | 1.282775  |
| C | 5.452849  | 3.558694  | -2.465403 |
| C | 3.817058  | 9.106076  | -1.701568 |
| C | 7.597583  | 6.452002  | 2.027452  |
| C | 3.704626  | 3.089155  | 4.826499  |
| C | 2.643705  | -7.465056 | -0.447205 |
| C | -3.327059 | 1.562719  | -4.391403 |
| C | -0.272736 | -5.087231 | -4.545540 |
| C | 1.953946  | -2.970846 | 4.635261  |
| C | 5.530725  | -2.757566 | 1.282775  |
| C | -5.452849 | -3.558694 | -2.465403 |
| C | -3.817058 | -9.106076 | -1.701568 |
| C | -7.597583 | -6.452002 | 2.027452  |
| C | -3.704626 | -3.089155 | 4.826499  |
| H | 8.403466  | 5.892311  | 2.513811  |
| H | 6.883990  | 6.811703  | 2.772277  |
| H | 8.014059  | 7.293202  | 1.463442  |
| H | 4.409759  | 3.539186  | 5.533934  |
| H | 3.032248  | 2.401812  | 5.350271  |
| H | 3.124176  | 3.865148  | 4.320226  |
| H | 4.358608  | 9.819529  | -1.071092 |
| H | 3.022793  | 9.624202  | -2.249660 |
| H | 4.503110  | 8.622550  | -2.400864 |
| H | 0.553817  | 5.885824  | -5.240854 |
| H | -0.446058 | 5.459761  | -3.812139 |
| H | -0.151780 | 4.243032  | -5.099358 |
| H | 6.081382  | 2.951574  | -3.126091 |
| H | 6.055737  | 4.329989  | -1.974739 |
| H | 4.638405  | 4.018150  | -3.030592 |
| H | 6.170309  | -3.644843 | 1.230247  |
| H | 4.726716  | -2.905753 | 2.007222  |
| H | 6.125067  | -1.881060 | 1.560250  |
| H | 3.622863  | -7.677320 | -0.889224 |

|   |           |           |           |
|---|-----------|-----------|-----------|
| H | 1.978549  | -8.324974 | -0.577737 |
| H | 2.747062  | -7.230553 | 0.615063  |
| H | -4.358608 | -9.819529 | -1.071092 |
| H | -3.022793 | -9.624202 | -2.249660 |
| H | -4.503110 | -8.622550 | -2.400864 |
| H | -8.403466 | -5.892311 | 2.513811  |
| H | -6.883990 | -6.811703 | 2.772277  |
| H | -8.014059 | -7.293202 | 1.463442  |
| H | -4.409759 | -3.539186 | 5.533934  |
| H | -3.032248 | -2.401812 | 5.350271  |
| H | -3.124176 | -3.865148 | 4.320226  |
| H | -3.622863 | 7.677320  | -0.889224 |
| H | -1.978549 | 8.324974  | -0.577737 |
| H | -2.747062 | 7.230553  | 0.615063  |
| H | -6.170309 | 3.644843  | 1.230247  |
| H | -4.726716 | 2.905753  | 2.007222  |
| H | -6.125067 | 1.881060  | 1.560250  |
| H | -2.683842 | 2.311250  | 5.116662  |
| H | -2.402654 | 3.460713  | 3.767618  |
| H | -1.600851 | 3.723094  | 5.349019  |
| H | 1.600851  | -3.723094 | 5.349019  |
| H | 2.683842  | -2.311250 | 5.116662  |
| H | 2.402654  | -3.460713 | 3.767618  |
| H | -0.553817 | -5.885824 | -5.240854 |
| H | 0.446058  | -5.459761 | -3.812139 |
| H | 0.151780  | -4.243032 | -5.099358 |
| H | -6.081382 | -2.951574 | -3.126091 |
| H | -6.055737 | -4.329989 | -1.974739 |
| H | -4.638405 | -4.018150 | -3.030592 |
| H | 2.790994  | -2.364518 | -4.910723 |
| H | 3.809518  | -1.956891 | -3.493654 |
| H | 4.076192  | -1.123119 | -5.058839 |
| H | -4.076192 | 1.123119  | -5.058839 |
| H | -2.790994 | 2.364518  | -4.910723 |
| H | -3.809518 | 1.956891  | -3.493654 |
